# Supplementary material for: Probing the potential of Al2CO/SiC heterostructures for visible light-driven photocatalytic water splitting using first-principles strategies
Source: Royal Society of Chemistry journal article supplement (doi:10.1039/d4ta00885e), 2024-01-01
Supplement: d4ta00885e1.pdf [file d4ta00885e1.pdf]

## Electronic Supplementary Information

### Probing the potential of Al<sub>2</sub>CO/SiC heterostructures for visible light driven photocatalytic water splitting using first-principles strategies

Amina Shehbaz<sup>1</sup>, Abdul Majid<sup>\*1</sup>, Hira Batool<sup>1</sup>, Mohammad Alkhedher<sup>2</sup>, Sajjad Haider<sup>3</sup>, Kamran Alam<sup>4</sup>

<sup>1</sup>Department of Physics, University of Gujrat, Gujrat 50700, Pakistan

<sup>2</sup>Mechanical and Industrial Engineering Department, Abu Dhabi University, Abu Dhabi 59911, United Arab Emirates

<sup>3</sup>Chemical Engineering Department, College of Engineering, King Saud University, P.O.Box 800, Riyadh 11421, Saudi Arabia

<sup>4</sup>Department of Chemical Engineering Materials Environment Sapienza university of Rome, Italy

\*Correspondence: [abdulmajid40@yahoo.com](mailto:abdulmajid40@yahoo.com)

1. Electronic Properties of the Al<sub>2</sub>CO, SiC, and Al<sub>2</sub>CO/SiC with different functionals.
2. Hirshfeld Charge Analysis of the interface.
3. PEDTA Analysis.
4. Calculation method to find Gibbs free energy for HER and OER.

1. Electronic Properties of the  $\text{Al}_2\text{CO}$ ,  $\text{SiC}$ , and  $\text{Al}_2\text{CO}/\text{SiC}$  with different functionals.

(a)

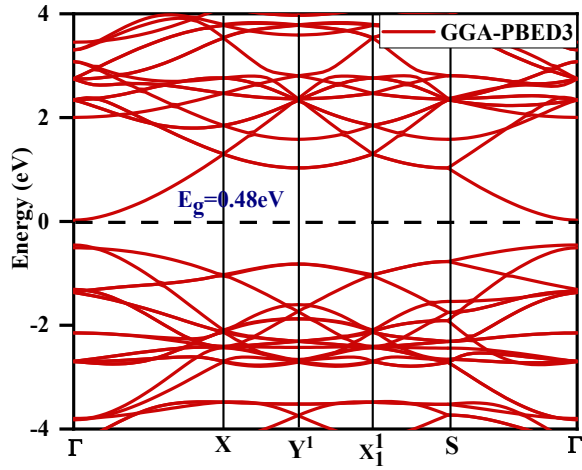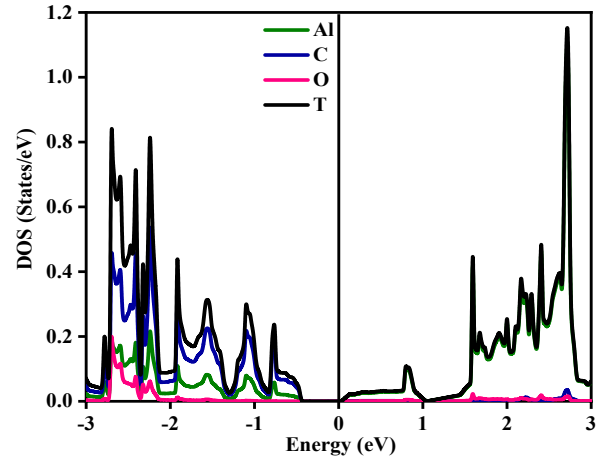

(b)

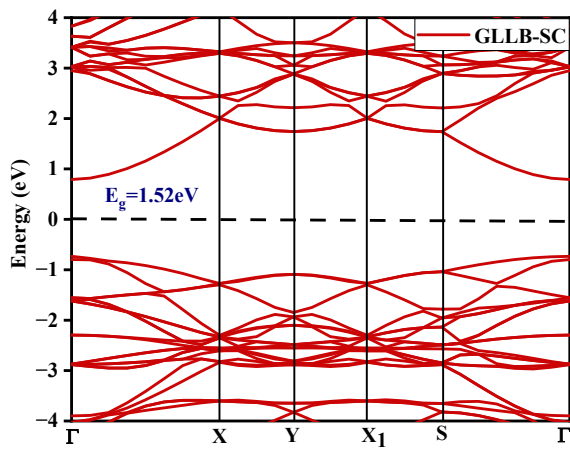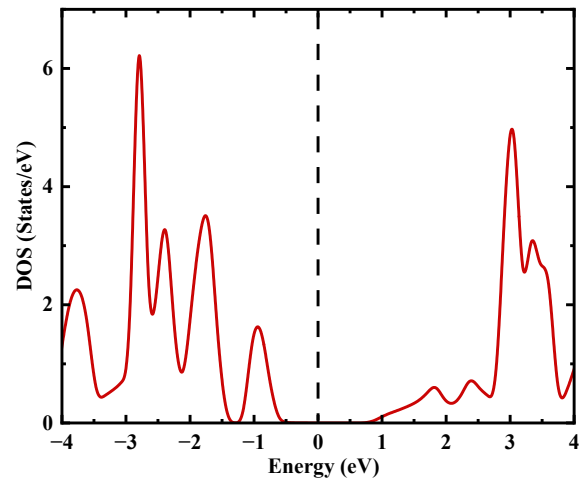

(c)

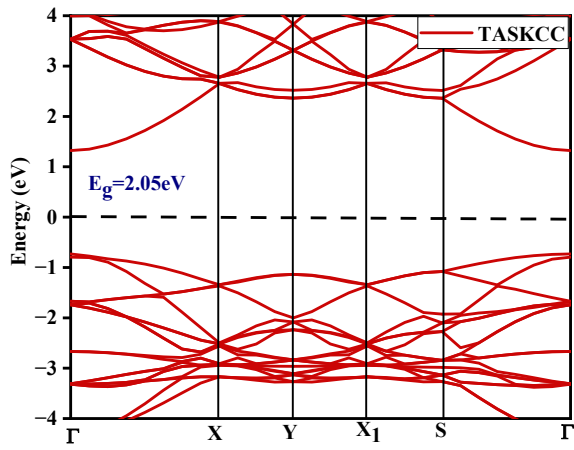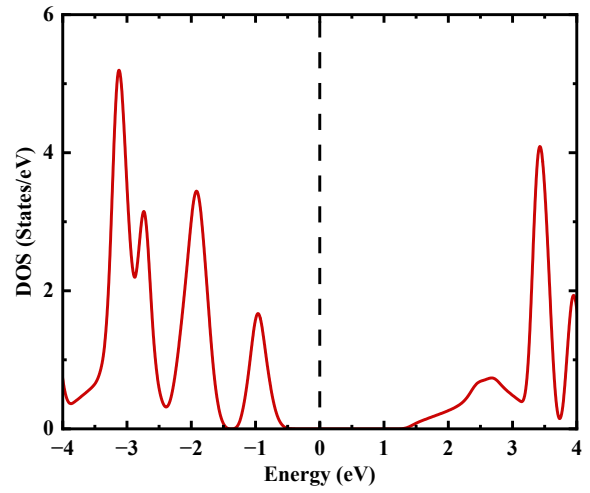

(d)

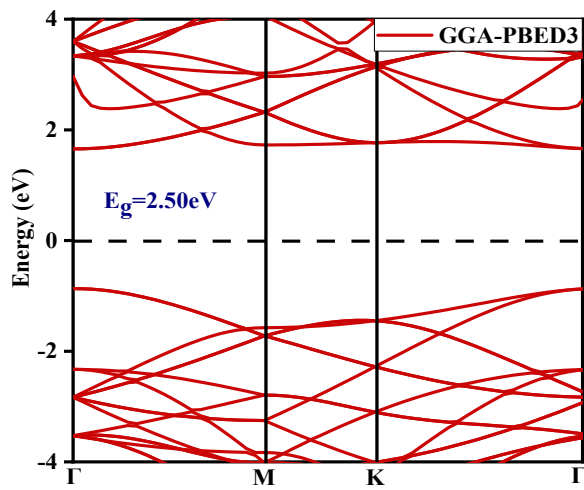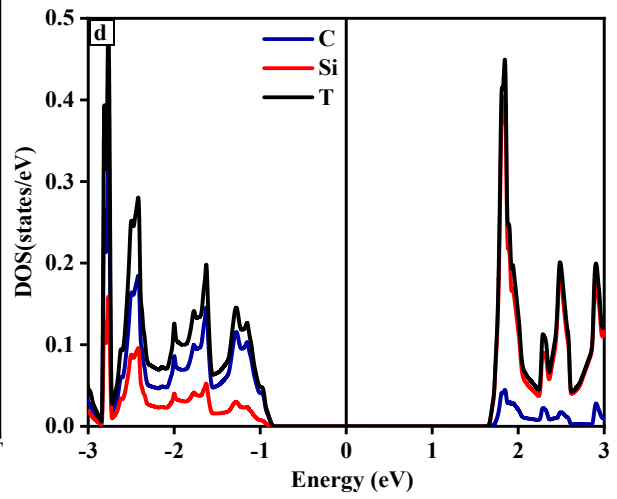

(e)

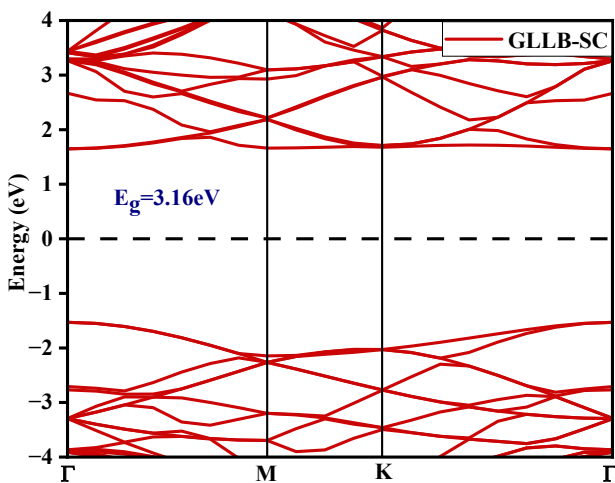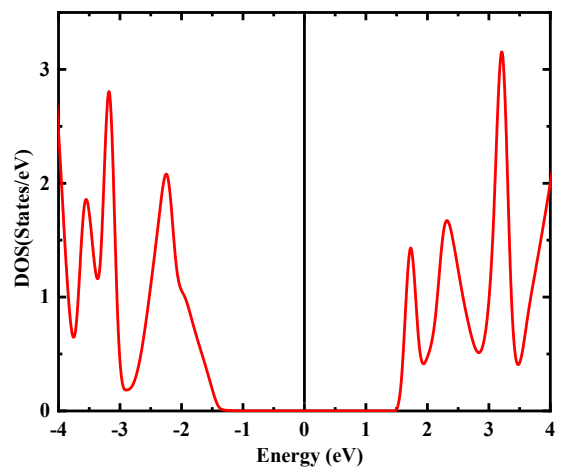

(f)

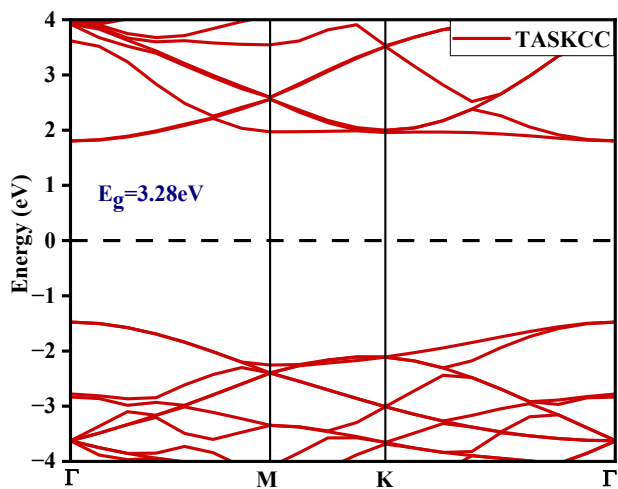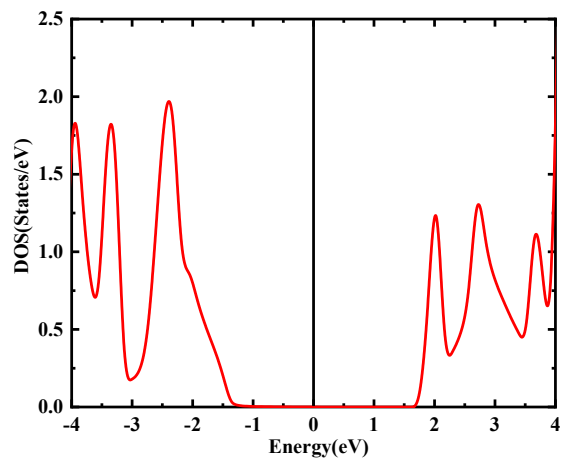

(g)

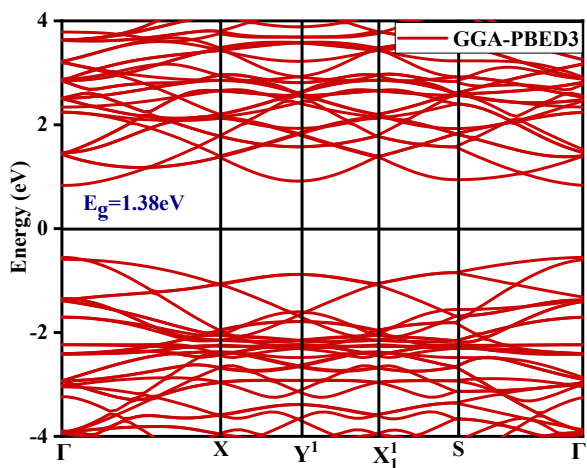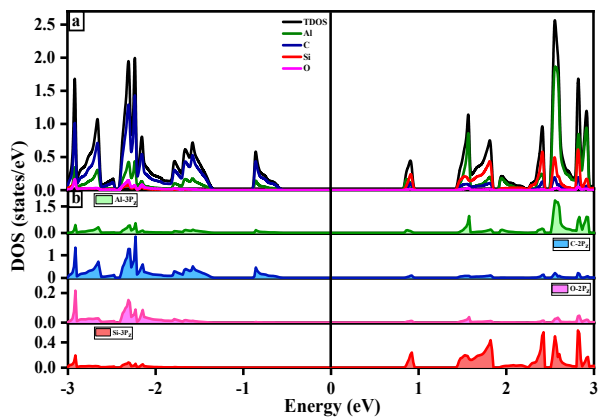

(h)

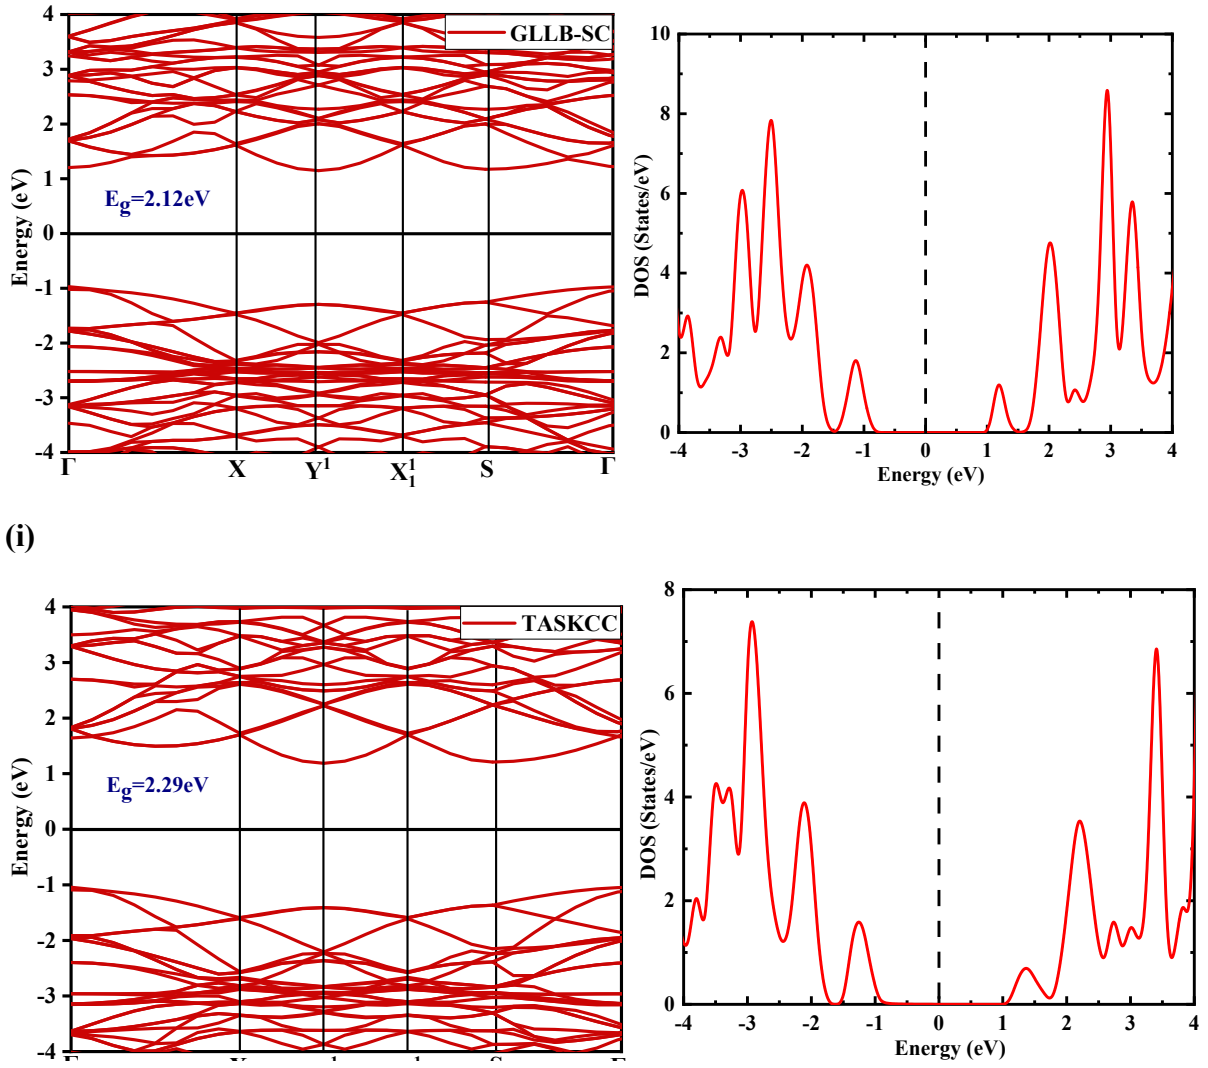

**Fig. S1.** The calculated band structure and DOS of Al<sub>2</sub>CO (a, b, c) SiC (d, e, f), and Al<sub>2</sub>CO/SiC (g, h, i) with different functionals such as GGA-PBED3, GLLB-SC, and TASKCC.

## 2. Hirshfeld Charge Analysis of interface

The value of Hirshfeld charges on the Al<sub>2</sub>CO/SiC interface as indicated in Fig. 6(c) are O(1) = O(2) = O(3) = O(4), O(32) = O(33) = O(34) = O(35) = O(36) = -0.231 e, Al(5) = Al(6) = Al(7) = Al(8), Al(10) = Al(11) = Al(13) = 0.390 e, Al(9) = Al(12) = 0.391 e, Al(14) = Al(15) = Al(17) = Al(19) = Al(20) = Al(21) = 0.324 e, Al(16) = Al(22) = 0.323 e, Al(18) = 0.325, C(23) = C(24) = C(26) = C(27) = C(29) = C(30) = -0.470 e, C(25) = C(28) = C(31) = -0.471 e, C(37) = C(52) = -0.339 e, C(38) = -0.340 e, Si(39) = Si(40) = Si(41) = Si(42) = Si(43) = Si(44) = Si(45) = Si(46) = Si(47) = 0.327 e, C(48) = C(49) = C(50) = C(51) = -0.340 e, C(53) = C(54) = -0.340 e. This indicates that Al and Si atoms have more positive charge behaves as a donor

while O and C atoms have more negative charge behaves as an acceptor so, the overall values of Hirshfeld charge are Al (0.391 e), Si (0.327 e), O (-0.231 e) and C (-0.471 e).

### 3. PED A Analysis

The value of ionization energies (IE) was calculated using PED A analysis to investigate the type of interaction between interface and water molecule. Lower total energy values or more favourable energy components (e.g., larger negative  $E_{\text{electrostatic}}$ ,  $E_{\text{orbital}}$ , and smaller positive  $E_{\text{steric}}$  values) indicate greater stability in PED A analysis. From Table S1 it can be seen that AD site forms the most stable structure and this illustrates that magnitude of IE in interface is higher than all other sites. These results are consistent with previous results such as adsorption energies and Hirshfeld charge analysis.

**Table. S1.** The calculated values of  $E_{\text{Pauli}}$ ,  $E_{\text{electrostatic}}$ ,  $E_{\text{steric}}$ ,  $E_{\text{orbital}}$ , and IE per PED A energy terms (in eV)

| Site | $E_{\text{Pauli}}$ | $E_{\text{electrostatic}}$ | $E_{\text{steric}}$ | $E_{\text{orbital}}$ | IE    |
|------|--------------------|----------------------------|---------------------|----------------------|-------|
| AA   | 2.80               | -2.24                      | 0.56                | -1.14                | -0.58 |
| AB   | 3.22               | -2.49                      | 0.73                | -1.38                | -0.65 |
| AC   | 3.09               | -2.39                      | 0.69                | -1.29                | -0.61 |
| AD   | 9.96               | -6.16                      | 3.81                | -11.22               | -7.42 |

#### 4. Calculation method to find Gibbs free energy for HER and OER

The value of  $\Delta G$  can be calculated by using equation (1):

$$\Delta G_{H^*} = \Delta E_H + \Delta E_{ZPE(H)} - T\Delta S_H \quad (1)$$

Where  $\Delta E_H$  represents the  $E_{\text{ad}}$  of H atom and can be calculated using equation (2),

$$\Delta E_H = E_{H^*} - E_* - \frac{1}{2}E_{H_2} \quad (2)$$

$E_{H^*}$  and  $E_*$  represent  $E_{\text{ad}}$  of the interface with and without the adsorbed hydrogen atom. The difference in zero-point energies and entropies of adsorbed H atom and  $\frac{1}{2}(H_2)$  in the gas phase

is represented by  $\Delta E_{ZPE(H)}$  and  $\Delta S_H$  at temperature 298.15 K. The  $\Delta E_{ZPE(H)}$  can be calculated using equation (3).

$$\Delta E_{ZPE(H)} = E_{ZPE(H^*)} - E_{ZPE(*)} - \frac{1}{2} E_{ZPE(H_2)} \quad (3)$$

Where  $E_{ZPE(H^*)}$ ,  $E_{ZPE(*)}$ , and  $\frac{1}{2} E_{ZPE(H_2)}$  are zero-point energy of the adsorbed H atom on the catalyst, zero-point energy of the catalyst, and gas phase  $H_2$ .

To identify the potential determining steps (PDS) of the OER Gibbs free energy differences ( $\Delta G$ ) for every elementary reaction step were determined by using the formulas (4) to (8) [1, 2]:

$$\Delta G_1 = G(HO^*) \quad (4)$$

$$\Delta G_2 = G(O^*) - G(HO^*) \quad (5)$$

$$\Delta G_3 = G(HOO^*) - G(O^*) \quad (6)$$

$$\Delta G_4 = 4.92 - G(HOO^*) \quad (7)$$

$$G(H^+ + e^-) = G\left(\frac{1}{2} H_2\right) \quad (8)$$

The  $E_{ad}$  of the intermediates such as  $HO^*$ ,  $O^*$ , and  $HOO^*$  can be calculated using equations (9) to (11) [3]:

$$\Delta E_{HO^*} = E(HO^*) - E(*) - (E_{H_2O} - 1/2 E_{H_2}) \quad (9)$$

$$\Delta E_{O^*} = E(O^*) - E(*) - (E_{H_2O} - E_{H_2}) \quad (10)$$

$$\Delta E_{HOO^*} = E(HOO^*) - E(*) - \left(2E_{H_2O} - \frac{3}{2}E_{H_2}\right) \quad (11)$$

**Table. S2.** The calculated adsorption energy ( $E_{ads}$ ), zero-point energy (ZPE), entropic corrections (TS), Gibbs free energy change

of different intermediate adsorbed on Al<sub>2</sub>CO/SiC surface such as HO\*, O\*, HOO\*.

| Al <sub>2</sub> CO/SiC | E <sub>ads</sub> (eV) | ZPE (eV) | TS (eV) | ΔG (eV) |
|------------------------|-----------------------|----------|---------|---------|
| HO*                    | -1.27                 | 2.53     | -0.38   | 1.64    |
| O*                     | -0.43                 | 2.49     | -0.18   | 2.24    |
| HOO*                   | -0.26                 | 2.49     | -0.52   | 2.75    |

### References:

- [1] S. Lu, H. L. Huynh, F. Lou, K. Guo, and Z. Yu, *Nanoscale.*, 2021, **13**, 12885-12895.
- [2] X. Xu, H. Xu, and D. Cheng, *Nanoscale.*, 2019, **11**, 20228-20237.
- [3] P. Zhai, M. Xia, Y. Wu, G. Zhang, J. Gao, B. Zhang, S. Cao, Y. Zhang, Z. Li, Z. Fan, C. Wang, X. Zhang, J. T. Miller, L. Sun and J. Hou, *Natur. Commu.*, 2021, **12**, 4587.
